# Supplementary material for: Cyclic vomiting and digestive symptoms in White–Sutton syndrome: a participatory study
Source: Research Square preprint supplement (doi:10.21203/rs.3.rs-7065996/v1), 2025-08-13
Supplement: Supplementary file 3 [file e221ed08a01c6a78070badf8.docx]

| Patient | Patient 1 | Patient 2 | Patient 3 | Patient 4 | Patient 5 | Patient 6 | Patient 7 | Patient 8 | Patient 9 | Patient 10 |
| --- | --- | --- | --- | --- | --- | --- | --- | --- | --- | --- |
| Variant | arr1q21.3(151325055_151398955) x1 | c.2646_2647del  p.(Asn882LysfsTer14) | c.2545+1del  p.? | c.2806G>T  p.(Gly396Ter) | c.2469del  p.(Thr824ProfsTer30) | c.1524-3C>G  p.? | c.1135C>T  p.(Arg379Ter) | c.3123_3125del  p.(Gln1042Ter) | c.2758_2771dup  p.(Gln925ProfsTer8) | arr1q21.2q21.3 (149383557152  122481)x1 |
| Inheritance | *De novo* | *De novo* | *De novo* | *De novo* | *De novo* | Inherited from a symptomatic parent | *De novo* | *De novo* | *De novo* | *De novo* |
| Age | 9 | 20 | 21 | 24 | 23 | 16 | 12 | 11 | 8 | 38 |
| Repeated vomiting & nausea | + | + | + | + | + | + | + | + | + | + |
| Age at the beginning | 1 | 2 | 4 | 1.5 | 5 | 12 | 3 | 7 | 1 | 1 |
| Abdominal pain/abdominal migraine | + / + | — / — | — / — | + / + | — / — | — / — | + / — | + / — | — / — | ND |
| Headache/  migraine | + / + | + / — | — / — | + / — | — / — | + / — | + / — | + / + | — / — | ND |
| CVS | — | + | + | — | + | — | — | — | — | — |
| Evolution | Stable | Improvement | Worsening | Improvement | Improvement | Improvement | Improvement | Worsening | Improvement | Improvement |
| Constipation | — | + | + | + | — | + | + | — | + | + |
| Rome IV criteria for constipation |  | + | + | + |  | — | + |  | + | — |
| Feeding difficulties | — | — | + | + | — | — | + | + | — | + |
| Enteral nutrition |  |  | + | — |  |  | — | — |  | + |
| GERD | — | — | + | + | + | — | + | + | + | + |
| Extra-digestive symptoms |  |  | — | — | + |  | + | + | — | + |
| Treatment |  | — | PPI | PPI | Sodium alginate |  | PPI | PPI | — | Fundoplication |
| Other GID |  |  |  |  |  |  |  |  |  |  |

| Patient | Patient 11 | Patient 12 | Patient 13 | Patient 14 | Patient 15 | Patient 16 | Patient 17 | Patient 18 | Patient 19 | Patient 20 |
| --- | --- | --- | --- | --- | --- | --- | --- | --- | --- | --- |
| Variant | c.3001C>T  p.(Arg1001Ter) | c.3206_3207del  p.(Tyr1069Ter) | c.1608C>G  p.(Tyr536Ter) | c.1180_1181del  p.(Met394ValfsTer9) | c.1496G>T  p.(Cys499Phe) | c.2259C>A  p.(Cys753Ter) | c.3259C>T  p.(Arg1087Ter) | c.2792del  p.(Pro931ArgfsTer10) | c.2065A>G  p.(Tyr1022Cys) | c.3456_3457del  p.(Glu1154ThrfsTer4) |
| Inheritance | *De novo* | *De novo* | *De novo* | *De novo* | *De novo* | *De novo* | *De novo* | *De novo* | *De novo* | *De novo* |
| Age | 25 | 17 | 14 | 14 | 10 | 4 | 6 | 2 | 9 | 15 |
| Repeated vomiting & nausea | + | + | — | — | — | — | — | — | — | — |
| Age at the beginning | 23 | 11 |  |  |  |  |  |  |  |  |
| Abdominal pain/abdominal migraine | — | ND |  |  |  |  |  |  |  |  |
| Headache/  migraine | ND | ND |  |  |  |  |  |  |  |  |
| CVS | — | — |  |  |  |  |  |  |  |  |
| Evolution | Stable | Improvement |  |  |  |  |  |  |  |  |
| Constipation | + | + | + | + | + | — | — | — | — | — |
| Rome IV criteria for constipation | + | + | + | + | — |  |  |  |  |  |
| Feeding difficulties | — | + | + | — | — | + | + | + | — | — |
| Enteral nutrition |  | — | — |  |  | — | — | — |  |  |
| GERD | — | — | + | — | — | + | + | — | — | — |
| Extra-digestive symptoms |  |  | — |  |  | + | ND |  |  |  |
| Treatment |  |  | — |  |  | PPI + sodium alginate | ND |  |  |  |
| Other GID |  |  |  |  |  |  |  |  | Diarrhoea | Bloating without constipation |
