# Supplementary material for: Cyclic vomiting and digestive symptoms in White–Sutton syndrome: a participatory study
Source: Research Square preprint supplement (doi:10.21203/rs.3.rs-7065996/v1), 2025-08-13
Supplement: Supplementary file 4 [file e5471095213aa435fe76c392.docx]

|  | Donnarumma et al., 2021 | Garde et al., 2020 | Dal et al., 2020 | Batzir et al., 2020 | Wright et al.,  2021 | Duan et al., 2023 | Merriweather et al., 2022 | Giraldo-Ocampo et al., 2022 | Murch et al., 2021 |
| --- | --- | --- | --- | --- | --- | --- | --- | --- | --- |
| Number of patients reported | 1 | 19 | 1 | 22 | 1 | 1 | 1 | 1 | 12 |
| Number of patients with GID | 0/1 | 8/12 (7 without information) | 0/1 | 17/19 | 1/1 | 1/1 | 1/1 | 0/1 | 5/12 |
| Which GID? |  | Oral sensory disorder (3), constipation (4) vomiting (1), CVS (2), occlusion (2) |  | Malrotation (2) fundoplication (2), G-tube feeding (4), CVS (6)  Some GID are not detailed. | Constipation, pelvic floor dysfunction, rectal prolapse, 38cm of tortuous colon removed | Ileus | Oral dysphagia, enteral feeding on gastrostomy, CVS, frequent GI symptoms |  | Oesophageal dysmotility (1), unsafe swallow and pyloric stenosis (1), initial delay in solids (3) |
| Genetic variant of patients presenting with GID |  | p.(Tyr1069Ter)  p.(Asn882LysfsTer14)  p.(Asp937MetfsTer12)  NM_015100.4:c.2545+1del - p.? (intron 17)  p.(Leu576Pro)  p.(Phe1104LeufsTer18)  p.(Glu1040Lys)  p.(Thr824ProfsTer30) |  | p.(Ser910Ter)  p.(Glu945Ter)  p.(Leu904Ter)  p.(Val951SerfsTer6)  p.(Ser278Ter) | p.(Arg1008Ter) | p.(Thr916ProfsTer12) | NM_15100.4:c.2546-20T>A  p.? (intron 17) |  | p.(Arg694Ter)  p.(Arg979PhefsTer3  p.(Pro336GlnfsTer23)  p.(His840GlnfsTer23)  p.(Leu904Ter) |
| CVS | 0/1 | 2/12 | 0/1 | 6/16 | 0/1 | 0/1 | 1/1 | 0/1 | 0/12 |

|  | Zhao et al., 2019 | Ye et al., 2015 | White et al., 2016 | Stessman et al., 2016 | Wang et al., 2016 | Dentici et al., 2017 | Samanta et al., 2020 | Pascolini et al., 2020 | Feretti et al., 2019 | Trimarchi et al., 2021 |
| --- | --- | --- | --- | --- | --- | --- | --- | --- | --- | --- |
| Number of patients reported | 1 | 7 | 5 | 25 | 1 | 1 | 1 | 1 | 1 | 1 |
| Number of patients with GID | 0/1 | 3/5 (2 UKN) | 4/4 (1 without information) | 10/19 (6 without information) | 0/1 | 1/1 | 1/1 | 1/1 | 1/1 | 1/1 |
| Which GID? |  | CVS | No information | Feeding problems  One vomiting  Malrotation |  | GER and chronic constipation | Feeding problems  Enteral feeding on gastrostomy | Dysphagia and drooling | Bad food tolerance with gastric distension | Feeding difficulties |
| Genetic variant among patients presenting with GID |  | p.(Gln1011Ter)  p.(Pro918ThrfsTer26)  32kb del 1q21.3 containing exons 4 to 19 of POGZ | p.(Thr922HisfsTer22)  p.(Ser278Ter)  p.(Arg979Ter)  p.(Leu927PhefsTer17) | p.(Arg1001Ter)  p.(Glu1154ThrfsTer4)  p.(Glu755SerfsTer36)  p.(Arg385SerfsTer4)  p.(Gln1283Ter)  p.(Glu1154ThrfsTer4)  p.(Gln1014Ter)  NM_015100.4:c.2545+1del - p.? (intron 17)  p.(Asp946MetfsTer12)  p.(Pro764LeufsTer27) |  | p.(Asn941fsTer3) | p.(Arg997Gln) | p.(Arg1211Ter) | p.(Leu904Ter) | NM_015100.4:c.2546-1G>A p.? (intron 17) |
| CVS | 0/1 | 3/5 | 0/4 | 0/19 | 0/1 | 0/1 | 0/1 | 0/1 | 0/1 | 0/1 |
